# Supplementary material for: Crystal Structure Analysis, Stability, Phase Transformation and Selective Nucleation Mechanism of Fluralaner Polymorphs
Source: MDPI journal article supplement (doi:10.3390/cryst13081241), 2023-08-11
Supplement: s1 [file s1]

## Supporting Information

### Crystal Structure Analysis, Stability, Phase Transformation and Selective Nucleation Mechanism of Fluralaner Polymorphs

*Guangyan Li<sup>1</sup>, Ting Wang<sup>1,2</sup>, Xin Huang<sup>1,2,3 \*</sup>, Na Wang<sup>1,2 \*</sup>, Lina Zhou<sup>1,2</sup>, Beiqian Tian<sup>1</sup>, Ziwei Feng<sup>1</sup>, Ailing Liu<sup>4</sup>, Yaling Li<sup>4</sup> and Hongxun Hao<sup>1,2</sup>*

1 National Engineering Research Center of Industrial Crystallization Technology, School of Chemical Engineering and Technology, Tianjin University, Tianjin 300072, China; 2020207362@tju.edu.cn (G.L.); wang\_ting@tju.edu.cn (T.W.); linazhou@tju.edu.cn (L.Z.); beiqiantian@tju.edu.cn (B.T.); 2020207427@tju.edu.cn (Z.F.); hongxunhao@tju.edu.cn (H.H.)

2 Collaborative Innovation Center of Chemical Science and Engineering (Tianjin), Tianjin 300072, China.

3 Zhejiang Institute of Tianjin University, Ningbo 311305, China.

4 Tianjin Ringpu Bio-technology Co Ltd, Tianjin 300072, China

\* Corresponding author email: x\_huang@tju.edu.cn (X.H.); wangna224@tju.edu.cn (N.W.)

**Table S1.** Experimental and simulated PXRD pattern peak positions (°) and relative

intensities (%) of Form I, Form II and Form III.

| Form I (exp) |      | Form II (exp) |      | Form III (exp) |      | Form I (calc) |      | Form II(calc) |      | Form III (calc) |      |
|--------------|------|---------------|------|----------------|------|---------------|------|---------------|------|-----------------|------|
| 2 $\theta$   | I%   | 2 $\theta$    | I%   | 2 $\theta$     | I%   | 2 $\theta$    | I%   | 2 $\theta$    | I%   | 2 $\theta$      | I%   |
| 4.281        | 66.4 | 9.339         | 1.3  | 4.181          | 20   | 4.421         | 100  | 9.359         | 7.8  | 4.4             | 100  |
| 4.561        | 1.2  | 10.16         | 9.3  | 8.519          | 24.5 | 8.859         | 20.9 | 10.2          | 45.5 | 8.802           | 28.5 |
| 8.621        | 49.7 | 10.599        | 5.4  | 10.881         | 9    | 11.3          | 11.9 | 10.581        | 4.1  | 11.261          | 13.6 |
| 11.019       | 6.9  | 11.24         | 5.4  | 12.477         | 1.9  | 12.8          | 5.8  | 11.28         | 23.7 | 12.818          | 9.5  |
| 12.521       | 0.9  | 11.8          | 4.1  | 12.859         | 4.4  | 13.299        | 1.8  | 11.8          | 13.8 | 13.221          | 2.6  |
| 12.999       | 7.4  | 12.22         | 16.3 | 13.543         | 3.7  | 13.741        | 6.5  | 12.26         | 58.7 | 14.04           | 10.6 |
| 13.46        | 1.7  | 13.281        | 1.5  | 14.239         | 21.1 | 14.041        | 9.1  | 13.321        | 3.2  | 14.72           | 36.8 |
| 14.36        | 4.7  | 14.74         | 27.7 | 14.541         | 7.8  | 14.738        | 30.7 | 14.781        | 59   | 14.94           | 11.2 |
| 14.681       | 5    | 15.241        | 5.7  | 16.099         | 9.1  | 14.978        | 5.1  | 15.3          | 17   | 16.6            | 15.8 |
| 16.219       | 3.7  | 15.92         | 15.8 | 16.62          | 13.2 | 15.542        | 2.2  | 15.599        | 3.7  | 17.121          | 49.6 |
| 16.76        | 6    | 16.9          | 4.3  | 17.24          | 16.8 | 16.361        | 4.1  | 15.901        | 13.8 | 17.699          | 50.4 |
| 17.581       | 5.1  | 17.921        | 4.5  | 18.54          | 15   | 16.621        | 13.8 | 16.999        | 9.3  | 17.918          | 27.5 |
| 17.979       | 2.9  | 18.48         | 28.9 | 19.22          | 10.4 | 17.1          | 28.2 | 17.519        | 3.3  | 19.022          | 9.7  |
| 18.7         | 18.6 | 20.06         | 57.7 | 19.699         | 6.6  | 17.659        | 9.9  | 17.978        | 12.9 | 19.599          | 35.5 |
| 19.299       | 8.9  | 20.419        | 17.5 | 20.94          | 100  | 17.959        | 11   | 18.519        | 41.5 | 20.098          | 26.9 |
| 21.08        | 56.7 | 21.299        | 98   | 21.621         | 58.3 | 18.38         | 10.4 | 18.781        | 19.1 | 21.561          | 86   |
| 21.8         | 100  | 21.859        | 11.2 | 22.099         | 27.3 | 19.119        | 6.4  | 19.441        | 2.8  | 22.139          | 25.8 |
| 22.221       | 18.7 | 22.66         | 22.9 | 22.7           | 9.4  | 19.601        | 30   | 20.1          | 100  | 22.642          | 56.3 |
| 22.881       | 25.1 | 23.179        | 11.5 | 23.66          | 13.1 | 20.098        | 1.2  | 20.5          | 42.5 | 23.241          | 7.6  |
| 23.281       | 1    | 24.002        | 1.8  | 24.24          | 19.3 | 20.399        | 2.3  | 20.92         | 11   | 23.739          | 13.4 |
| 23.76        | 6.9  | 24.62         | 9.4  | 24.72          | 42.4 | 20.702        | 6.6  | 21.301        | 51.3 | 24.181          | 76.9 |
| 24.36        | 8.1  | 25.64         | 11.9 | 26.059         | 60.7 | 20.94         | 8.7  | 21.898        | 37   | 24.741          | 41.2 |
| 24.879       | 57.4 | 26.1          | 28.5 | 26.96          | 22.4 | 21.56         | 82.5 | 22.261        | 19.3 | 25.261          | 47.3 |
| 26.24        | 78.4 | 26.7          | 100  | 27.5           | 8.1  | 22.242        | 23   | 22.663        | 21.8 | 25.781          | 4.7  |
| 27.159       | 16.9 | 27.52         | 3.8  | 28.719         | 6.6  | 22.7          | 29.4 | 23.259        | 18.2 | 26.501          | 44.3 |
| 27.659       | 6.8  | 28.24         | 15.6 | 29.561         | 13.7 | 23.379        | 14.1 | 23.6          | 3.3  | 26.9            | 20.8 |
| 28.5         | 1.7  | 28.839        | 3.6  | 30.04          | 4.9  | 23.741        | 5.4  | 24.06         | 3    | 27.459          | 10.9 |
| 28.861       | 6    | 30.179        | 6.7  | 30.6           | 3    | 24.24         | 43.8 | 24.661        | 21.8 | 27.66           | 17   |
| 29.48        | 5.3  | 30.68         | 6.9  | 31.28          | 11   | 24.799        | 24.8 | 25.62         | 14.9 | 28.12           | 9.6  |
| 29.74        | 5.4  | 31.74         | 3    | 32.84          | 10.2 | 25.36         | 36.1 | 26.119        | 35.5 | 29.32           | 21.9 |
| 30.181       | 2.2  | 32.22         | 5.1  | 34.98          | 7.4  | 26.081        | 2.2  | 26.719        | 52.3 | 29.721          | 3.8  |
| 31.021       | 1.9  | 33.46         | 2.2  | 37.139         | 6    | 26.56         | 37.7 | 27.362        | 4.5  | 30.001          | 11.3 |
| 31.521       | 8.3  | 34.28         | 3.8  | 38.439         | 3.9  | 26.779        | 21.7 | 27.558        | 9.4  | 30.338          | 33.9 |
| 33.059       | 14.5 | 35.439        | 2.1  | 39.081         | 2.9  | 26.979        | 10   | 28.26         | 15.3 | 30.579          | 7.7  |
| 35.299       | 3.7  | 36.02         | 2.1  |                |      | 27.501        | 7.4  | 28.861        | 8    | 30.78           | 4    |
| 35.999       | 2.3  | 36.98         | 5.3  |                |      | 27.721        | 11.2 | 29.659        | 3    | 31.322          | 9.5  |
| 36.88        | 2.3  | 37.741        | 1.5  |                |      | 28.2          | 7.3  | 30.2          | 7.9  | 31.96           | 9.9  |
| 37.299       | 3.5  | 38.839        | 3.1  |                |      | 28.981        | 6.5  | 30.719        | 8.8  | 32.96           | 7.9  |
| 38.541       | 1.1  |               |      |                |      | 29.421        | 11   | 30.92         | 6    | 33.2            | 13.6 |
| 39.539       | 3.8  |               |      |                |      | 30.021        | 9.1  | 31.299        | 5.7  | 33.522          | 8.1  |

|  |  |  |        |      |        |      |        |      |
|--|--|--|--------|------|--------|------|--------|------|
|  |  |  | 30.28  | 10.3 | 31.701 | 5.2  | 34.099 | 5.8  |
|  |  |  | 30.681 | 5.9  | 32.221 | 11.1 | 34.658 | 1.7  |
|  |  |  | 31.218 | 1.3  | 33.139 | 3.1  | 35.021 | 1.6  |
|  |  |  | 31.58  | 3.6  | 33.4   | 3.5  | 35.818 | 12   |
|  |  |  | 32.121 | 5.9  | 33.78  | 3.6  | 36.28  | 4.3  |
|  |  |  | 32.482 | 0.9  | 34.321 | 5.7  | 36.901 | 3.9  |
|  |  |  | 33.28  | 4.3  | 35.161 | 3.7  | 37.259 | 2.6  |
|  |  |  | 33.68  | 6.4  | 35.481 | 4.1  | 37.579 | 14.2 |
|  |  |  | 34.02  | 5.1  | 36.081 | 5.8  | 38.1   | 10.1 |
|  |  |  | 34.86  | 3.4  | 36.401 | 2.5  | 39.159 | 8.6  |
|  |  |  | 35.94  | 3.6  | 37.061 | 10.4 | 39.999 | 8.6  |
|  |  |  | 36.419 | 9.3  | 37.419 | 3.3  |        |      |
|  |  |  | 36.98  | 2    | 37.801 | 4.4  |        |      |
|  |  |  | 37.64  | 6.7  | 38.301 | 3.5  |        |      |
|  |  |  | 38.159 | 4.7  | 38.939 | 5.9  |        |      |
|  |  |  | 39.32  | 2.5  | 39.26  | 2.5  |        |      |
|  |  |  |        |      | 39.801 | 2.5  |        |      |

**Table S2.** Hydrogen bonds in crystal structures of Form I, Form II and Form III of fluralaner.

|          | D-H...A        | d(D-H), Å | d(H...A), Å | d(D-A), Å | ∠(DHA), deg. |
|----------|----------------|-----------|-------------|-----------|--------------|
| Form I   | N2-H2...O2     | 0.880     | 1.961       | 2.796     | 157.70       |
|          | C12-H12...C15  | 0.950     | 2.860       | 3.764     | 159.41       |
|          | C17-H17B...O3  | 0.990     | 2.347       | 3.224     | 147.06       |
|          | N3-H3...O3     | 0.880     | 2.638       | 3.158     | 118.86       |
|          | N2-H2...O2     | 0.880     | 1.963       | 2.786     | 155.24       |
|          | C4-H4...F5     | 0.951     | 2.926       | 3.107     | 91.95        |
|          | C8-H8A...F5    | 0.990     | 2.531       | 3.517     | 173.58       |
|          | C15-H15...O2   | 0.950     | 2.526       | 3.419     | 156.54       |
|          | N3-H3...N1     | 0.880     | 2.527       | 3.222     | 136.45       |
|          | C19-H19B...O1  | 0.990     | 2.368       | 3.154     | 135.85       |
| Form II  | N3-H3...O2     | 0.902     | 2.182       | 3.021     | 154.45       |
|          | C19-H19A...C14 | 0.970     | 2.597       | 3.552     | 168.36       |
|          | C17-H17A...C14 | 0.970     | 2.821       | 3.675     | 147.29       |
|          | C17-H17A...C15 | 0.970     | 2.882       | 3.601     | 131.72       |
|          | C8-H8A...O3    | 0.970     | 2.327       | 3.229     | 154.59       |
|          | N3-H3...O2     | 0.893     | 2.209       | 3.036     | 153.81       |
|          | C22-H22...N1   | 0.960     | 2.723       | 3.594     | 151.27       |
|          | C4-H4...O3     | 0.930     | 2.445       | 3.301     | 153.16       |
|          | C17-H17...O1   | 0.970     | 2.874       | 3.212     | 101.59       |
|          | N2-H2...N1     | 0.898     | 2.363       | 3.108     | 140.44       |
| Form III | N2-H2...O2     | 0.880     | 1.967       | 2.798     | 156.80       |

|               |       |       |       |        |
|---------------|-------|-------|-------|--------|
| C12-H12...C15 | 0.950 | 2.892 | 3.795 | 159.14 |
| C17-H17B...O3 | 0.990 | 2.335 | 3.211 | 147.06 |
| N3-H3...O3    | 0.881 | 2.589 | 3.125 | 120.03 |
| C4-H4...F5    | 0.950 | 2.971 | 3.145 | 91.65  |
| C8-H8A...F5   | 0.990 | 2.499 | 3.486 | 174.57 |
| C15-H15...O2  | 0.950 | 2.538 | 3.422 | 154.73 |
| N3-H3...N1    | 0.881 | 2.528 | 3.225 | 136.49 |
| C19-H19B...O1 | 0.991 | 2.388 | 3.165 | 134.77 |

**Table S3.** The detailed data of torsion angles.

| Torsion angle (°) | Form I-S  | Form I-R  | FormII-R1 | FormII-R2 | Form III  |
|-------------------|-----------|-----------|-----------|-----------|-----------|
| Cl1-C1-C2-C3      | -179.4(2) | 178.8(2)  | 179.3(3)  | 179.5(4)  | 179.5(4)  |
| Cl1-C1-C6-C5      | -179.7(2) | -179.4(2) | 179.6(3)  | 179.4(3)  | -179.9(4) |
| Cl2-C3-C4-C5      | -178.4(2) | 178.0(2)  | 176.7(3)  | 178.5(4)  | 177.6(4)  |
| O1-N1-C9-C8       | 1.3(4)    | -1.3(4)   | 2.5(5)    | 1.3(5)    | -1.4(6)   |
| O1-N1-C9-C10      | -178.0(3) | 176.8(3)  | -179.5(3) | -179.6(3) | 177.1(4)  |
| O1-C7-C8-C9       | 4.5(3)    | -3.6(3)   | 6.3(4)    | 6.9(4)    | -2.9(5)   |
| O1-C7-C21-F1      | -60.7(3)  | 57.9(3)   | 60.4(5)   | 59.2(5)   | 58.6(5)   |
| O1-C7-C21-F2      | 179.0(2)  | 179.8(2)  | 179.8(4)  | -179.6(3) | 179.8(4)  |
| O1-C7-C21-F3      | 60.4(4)   | -61.5(3)  | -60.0(5)  | -58.6(5)  | -60.8(5)  |
| N1-O1-C7-C5       | 119.2(3)  | -119.6(2) | -130.6(3) | -131.5(3) | -121.0(4) |
| N1-O1-C7-C8       | -4.2(3)   | 3.2(3)    | -5.5(4)   | -6.8(4)   | 2.4(5)    |
| N1-O1-C7-C21      | -122.4(3) | 120.8(3)  | 109.5(4)  | 109.7(3)  | 119.7(4)  |
| N1-C9-C10-C15     | -1.5(5)   | 1.6(5)    | 3.7(6)    | 4.3(6)    | 1.2(8)    |
| N1-C9-C10-C11     | 175.8(3)  | -176.3(3) | -176.7(4) | -174.6(4) | -176.9(5) |
| N2-C17-C18-O3     | -93.2(4)  | 90.6(3)   | 167.3(3)  | 165.5(4)  | 92.0(6)   |
| N2-C17-C18-N3     | 84.0(3)   | -86.7(3)  | -13.0(5)  | -16.1(6)  | -85.3(5)  |
| N3-C19-C20-F4     | 55.2(4)   | -54.7(4)  | -57.7(5)  | -58.2(5)  | -55.6(6)  |
| N3-C19-C20-F5     | 174.8(3)  | -174.9(3) | -177.2(4) | -178.0(3) | -174.5(4) |
| N3-C19-C20-F6     | -65.1(4)  | 66.3(4)   | 61.6(6)   | 62.2(5)   | 67.0(6)   |
| C1-C2-C3-Cl2      | 177.8(2)  | -177.5(2) | -177.4(3) | -179.0(4) | -177.0(4) |
| C1-C2-C3-C4       | -1.3(5)   | 1.2(5)    | -0.1(6)   | 0.0(9)    | 0.6(8)    |
| C2-C1-C6-C5       | -0.3(5)   | 0.5(5)    | -0.2(6)   | -0.7(7)   | 0.4(8)    |
| C2-C3-C4-C5       | 0.6(4)    | -0.7(4)   | -0.7(6)   | -0.5(9)   | 0.0(8)    |
| C3-C4-C5-C6       | 0.2(4)    | 0.1(4)    | 1.0(5)    | 0.4(7)    | -0.4(7)   |
| C3-C4-C5-C7       | 179.7(3)  | 178.7(3)  | -177.5(3) | -179.3(4) | -179.1(4) |
| C4-C5-C6-C1       | -0.4(4)   | 0.0(4)    | -0.6(5)   | 0.1(6)    | 0.2(7)    |
| C4-C5-C7-O1       | -171.7(2) | 171.3(2)  | 134.5(3)  | 142.5(4)  | 171.8(4)  |
| C4-C5-C7-C8       | -53.8(4)  | 53.7(4)   | 17.4(5)   | 25.3(6)   | 54.1(6)   |
| C4-C5-C7-C21      | 74.8(4)   | -74.1(4)  | -109.7(4) | -100.8(5) | -74.0(6)  |
| C5-C7-C8-C9       | -115.6(3) | 116.6(3)  | 125.2(3)  | 126.1(4)  | 117.2(4)  |
| C5-C7-C21-F1      | 56.4(4)   | -60.3(4)  | -56.7(6)  | -58.2(5)  | -59.2(6)  |

|                 |           |           |           |           |           |
|-----------------|-----------|-----------|-----------|-----------|-----------|
| C5–C7–C21–F2    | -63.9(4)  | 61.5(4)   | 62.8(5)   | 63.1(5)   | 62.0(6)   |
| C5–C7–C21–F3    | 177.5(3)  | -179.7(3) | -177.0(4) | -175.9(4) | -178.5(4) |
| C6–C1–C2–C3     | 1.1(5)    | -1.1(5)   | 0.6(6)    | 0.6(8)    | -0.8(8)   |
| C6–C5–C7–O1     | 7.8(4)    | -7.4(4)   | -44.1(4)  | -37.2(5)  | -6.9(6)   |
| C6–C5–C7–C8     | 125.7(3)  | -125.0(3) | -161.1(3) | -154.5(4) | -124.6(5) |
| C6–C5–C7–C21    | -105.7(3) | 107.1(3)  | 71.8(4)   | 79.4(5)   | 107.3(5)  |
| C7–O1–N1–C9     | 1.9(3)    | -1.3(3)   | 2.2(4)    | 3.7(5)    | -0.8(5)   |
| C7–C5–C6–C1     | -179.9(3) | 178.7(3)  | 178.0(3)  | 179.9(4)  | 178.9(4)  |
| C7–C8–C9–N1     | -3.7(4)   | 3.1(4)    | -5.7(4)   | -5.4(5)   | 2.8(6)    |
| C7–C8–C9–C10    | 175.6(3)  | -174.9(3) | 176.3(3)  | 175.6(4)  | -175.7(5) |
| C8–C7–C21–F1    | -173.9(3) | 170.8(3)  | 172.1(4)  | 172.0(4)  | 171.3(4)  |
| C8–C7–C21–F2    | 65.8(3)   | -67.3(3)  | -68.4(5)  | -66.7(5)  | -67.5(5)  |
| C8–C7–C21–F3    | -52.8(4)  | 51.4(4)   | 51.7(5)   | 54.3(5)   | 51.9(6)   |
| C8–C9–C10–C15   | -179.2(3) | 179.5(3)  | 1.1(6)    | 4.3(6)    | 179.5(5)  |
| C8–C9–C10–C11   | -3.5(5)   | 1.6(5)    | -178.5(4) | -176.8(4) | 1.5(7)    |
| C9–C10–C15–C14  | 177.6(3)  | -178.2(3) | -178.8(3) | -178.7(4) | -178.1(5) |
| C9–C10–C11–C12  | -177.1(3) | 177.3(3)  | -179.9(4) | -179.6(4) | 177.6(5)  |
| C10–C15–C14–C13 | -0.3(6)   | 0.5(5)    | -1.3(6)   | -2.2(6)   | 0.2(8)    |
| C10–C15–C14–C22 | 179.2(4)  | 179.6(4)  | 179.6(4)  | 178.6(4)  | 179.2(5)  |
| C15–C10–C11–C12 | -0.2(5)   | -0.3(5)   | 0.5(6)    | -0.7(7)   | -0.5(7)   |
| C15–C14–C13–C12 | 0.7(5)    | 0.1(5)    | 0.5(6)    | 0.4(6)    | 0.2(8)    |
| C15–C14–C13–C16 | -174.8(3) | 175.3(3)  | 176.5(3)  | 177.2(4)  | 175.0(5)  |
| C14–C13–C12–C11 | 0.2(5)    | -1.0(5)   | 0.8(6)    | 1.2(7)    | -0.8(8)   |
| C14–C13–C16–O2  | 103.9(4)  | -102.2(4) | -58.9(6)  | -60.6(6)  | -101.9(6) |
| C14–C13–C16–N2  | -78.3(4)  | 78.9(4)   | 121.4(4)  | 118.9(4)  | 79.1(6)   |
| C13–C12–C11–C10 | -0.3(6)   | 0.5(5)    | -1.3(6)   | -1.0(7)   | 0.9(8)    |
| C12–C13–C16–O2  | -71.7(4)  | 73.2(4)   | 117.2(5)  | 116.2(5)  | 73.0(7)   |
| C12–C13–C16–N2  | 106.1(3)  | -105.7(3) | -62.4(5)  | -64.3(5)  | -106.0(6) |
| C11–C10–C15–C14 | 0.3(5)    | -0.3(5)   | 0.8(6)    | 2.4(6)    | 0.0(8)    |
| C16–N2–C17–C18  | -95.8(3)  | 96.4(3)   | 137.2(4)  | 138.6(4)  | 96.8(6)   |
| C16–C13–C12–C11 | 175.5(3)  | -176.4(3) | -175.3(4) | -175.6(4) | -175.8(5) |
| C17–N2–C16–O2   | -1.4(5)   | 1.0(5)    | -8.2(7)   | -7.8(6)   | 0.7(8)    |
| C17–N2–C16–C13  | -179.1(3) | 179.9(3)  | 171.5(4)  | 172.7(3)  | 179.7(4)  |
| C18–N3–C19–C20  | 98.5(4)   | -96.9(4)  | 95.2(5)   | 96.2(4)   | -98.3(6)  |
| C19–N3–C18–O3   | 0.6(5)    | -0.8(5)   | -6.2(5)   | -7.0(6)   | -0.8(8)   |
| C19–N3–C18–C17  | -176.6(3) | 176.5(3)  | 174.1(3)  | 174.8(4)  | 176.4(4)  |
| C21–C7–C8–C9    | 116.4(3)  | -115.5(3) | -106.4(4) | -107.5(4) | -114.7(4) |
| C22–C14–C13–C12 | -179.1(4) | -179.0(4) | 179.6(4)  | 179.6(4)  | -178.8(5) |
| C22–C14–C13–C16 | 3.6(5)    | -3.8(5)   | -4.3(6)   | -3.7(7)   | -4.1(8)   |

**Table S4.** Torsion angles of various conformers.

| Torsion angle(°) | Form I-R | Form II-R1 | Form II-R2 | Form III-R |
|------------------|----------|------------|------------|------------|
| N1-C9-C10-C15    | 1.6      | -176.7     | -174.6     | 1.2        |
| C14-C13-C16-N2   | 78.9     | 121.4      | 118.9      | 79.1       |
| C16-N2-C17-C18   | 96.4     | 137.2      | 138.6      | 96.8       |
| N2-C17-C18-N3    | -86.7    | -13.0      | -16.1      | -85.3      |

**Table S5.** Molecular dynamics simulation details.

| Number of molecules | Isopropanol solution | isopropanol/hexane solution |
|---------------------|----------------------|-----------------------------|
| Isopropanol         | 500                  | 125                         |
| n-hexane            | 0                    | 375                         |
| Fluralaner (S)      | 5                    | 5                           |
| Fluralaner (R)      | 5                    | 5                           |

**Table S6.** Thermal Data for Different Forms of Fluralaner Obtained by DSC.

|                                 | Form I | Form II | Form III       |
|---------------------------------|--------|---------|----------------|
| T <sub>onset</sub> (°C)         | 175.24 | 171.38  | 165.07, 174.31 |
| T <sub>m</sub> (°C)             | 177.61 | 174.74  | 169.22, 176.31 |
| enthalpy, $\Delta H_f$ (kJ/mol) | 51.72  | 57.19   | 8.18, 45.68    |

**Table S7.** The results of cooling crystallization experiment.

| Solvent | supersaturation | Form |
|---------|-----------------|------|
|---------|-----------------|------|

|                               |       |     |
|-------------------------------|-------|-----|
| methanol                      | 1 ~ 4 | I   |
| ethanol                       | 1 ~ 4 | I   |
| isopropanol                   | 1 ~ 4 | I   |
| n-propanol                    | 1 ~ 4 | I   |
| isopropanol/n-hexane(1:5 v/v) | 1 ~ 4 | III |
| n-propanol/n-hexane(1:5 v/v)  | 1 ~ 4 | III |

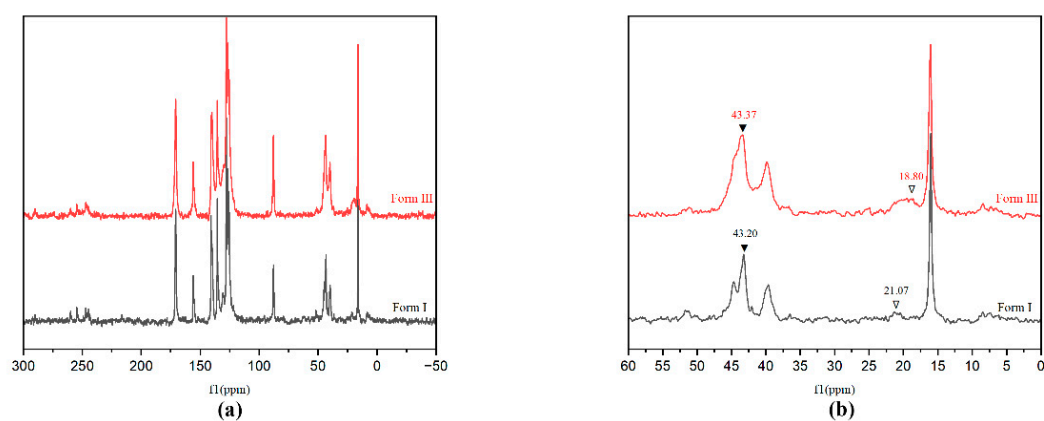

**Figure S1.** Solid-state NMR spectra of fluralaner Form I and Form III.

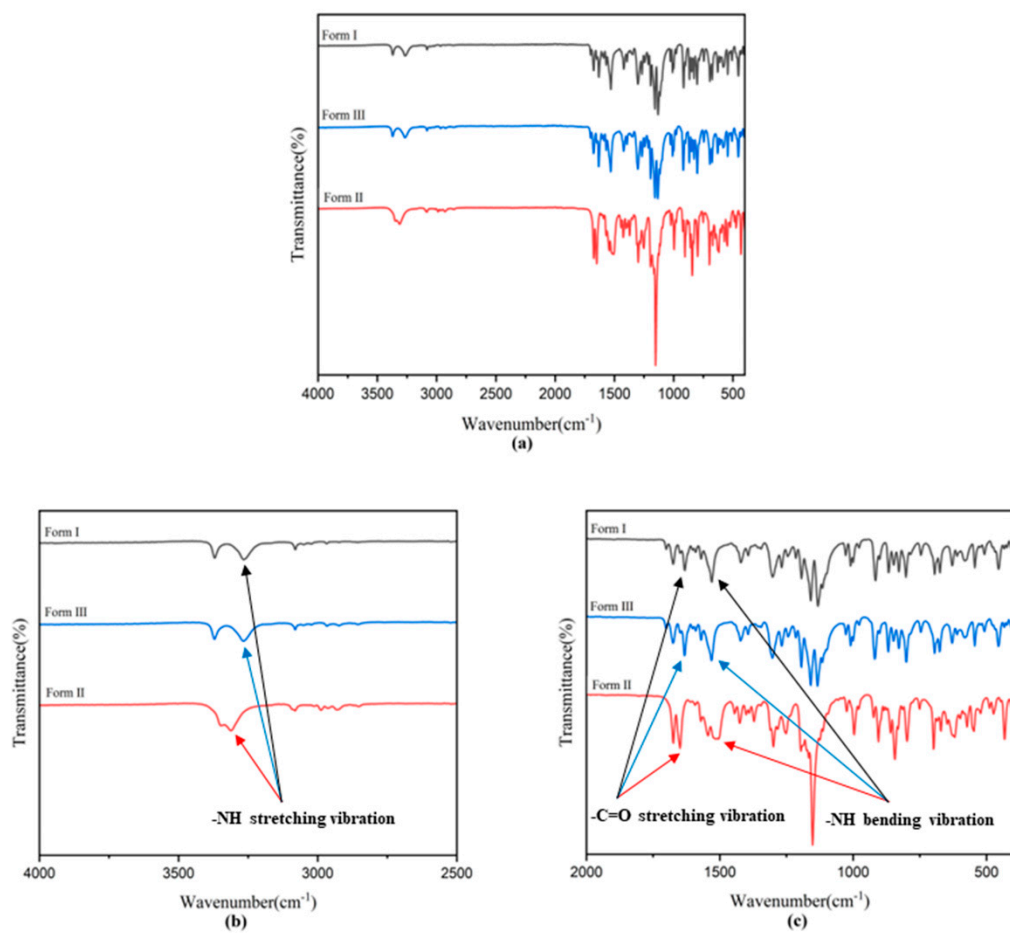

**Figure S2.** The FT-IR curves of Form I, Form II and Form III.

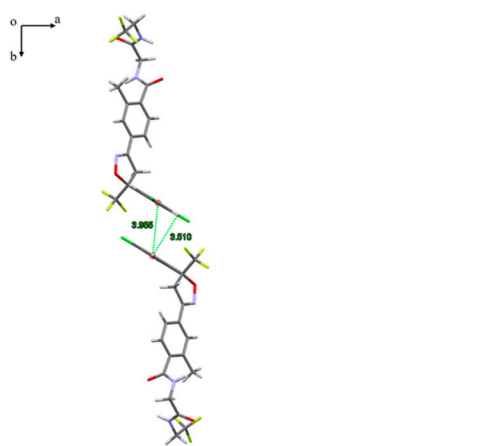

**Figure S3.** Weak  $\pi$ - $\pi$  interactions in the crystal structure of Form I



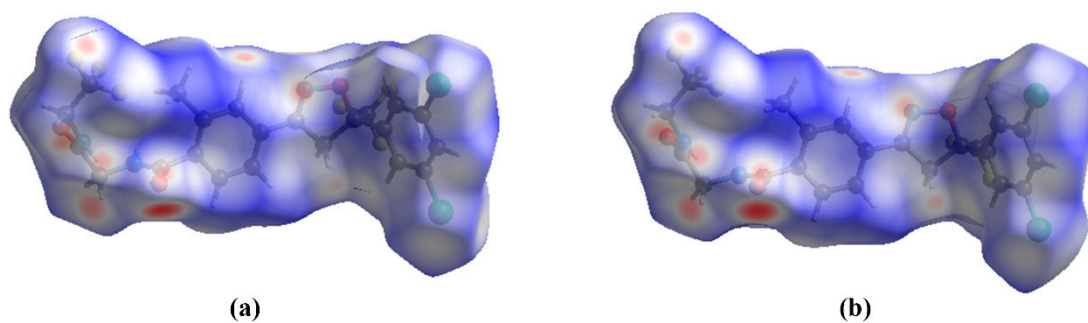

**Figure S4.** A view of Hirshfeld surface mapped over  $d_{\text{norm}}$  for crystal forms of Fluralaner: (a) Form I, (b) Form III.

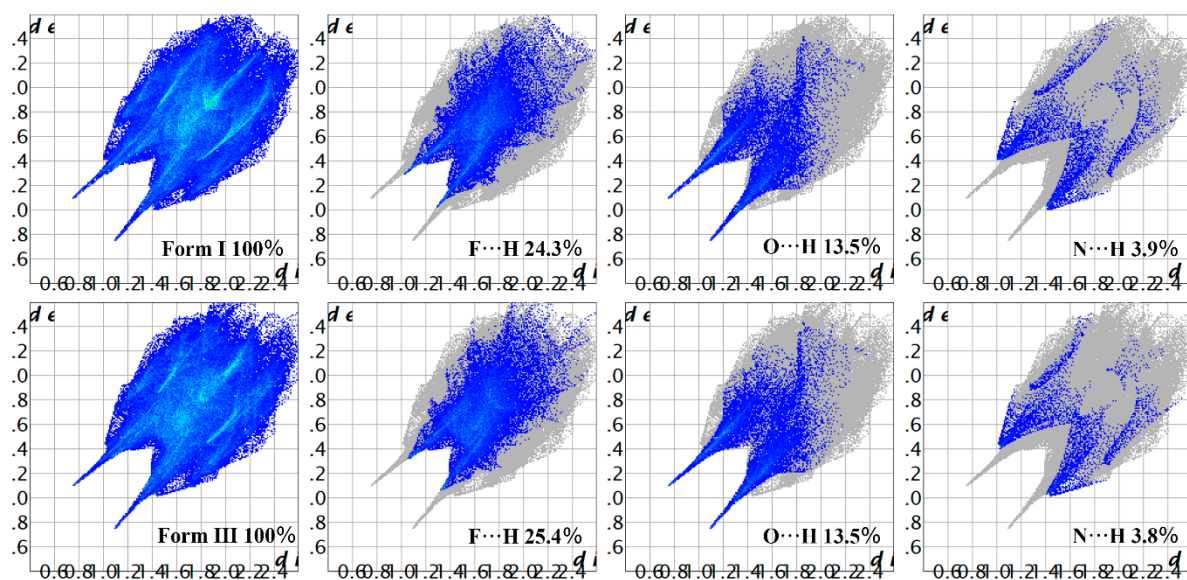

**Figure S5.** 2D Hirshfeld fingerprint plots for Form I and Form III.

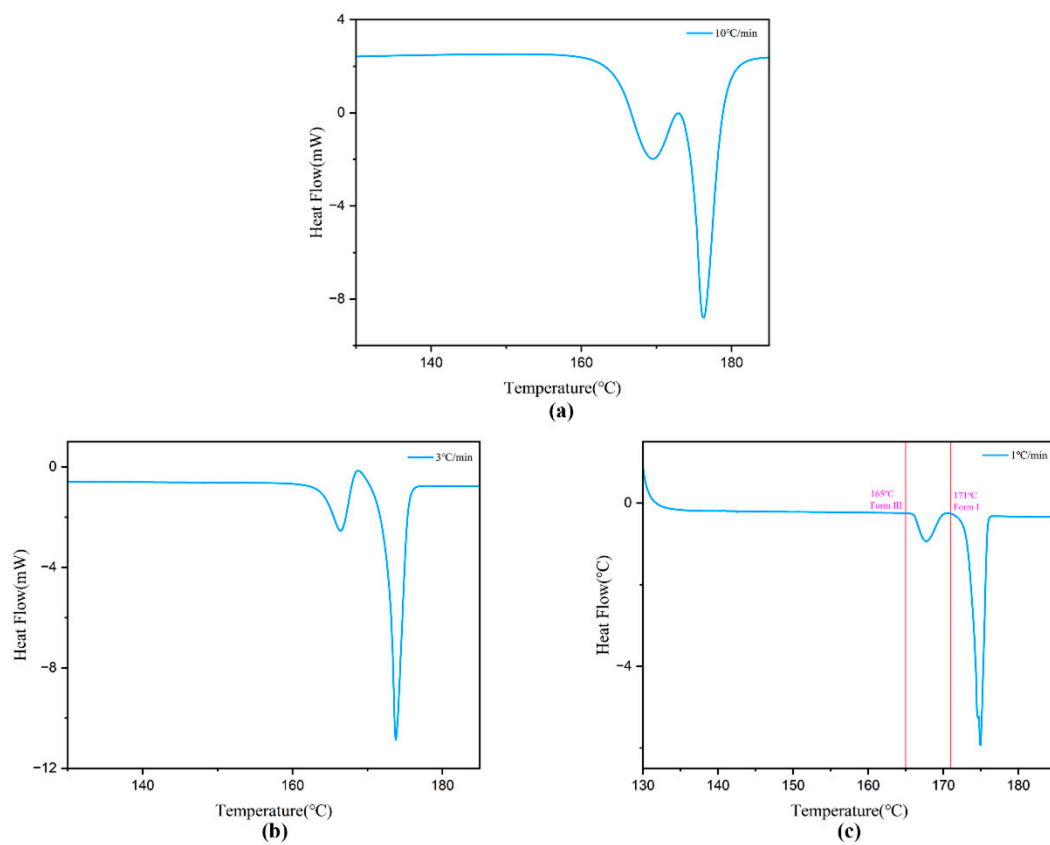

**Figure S6.** DSC curves of Form III at different heating rates,(a) 10°C/min, (b) 3/min, (c)1°C/min

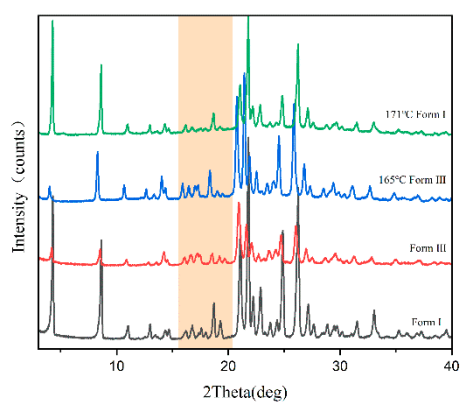

**Figure S7.** PXRD of Form III at different temperatures (165°C and 171°C).

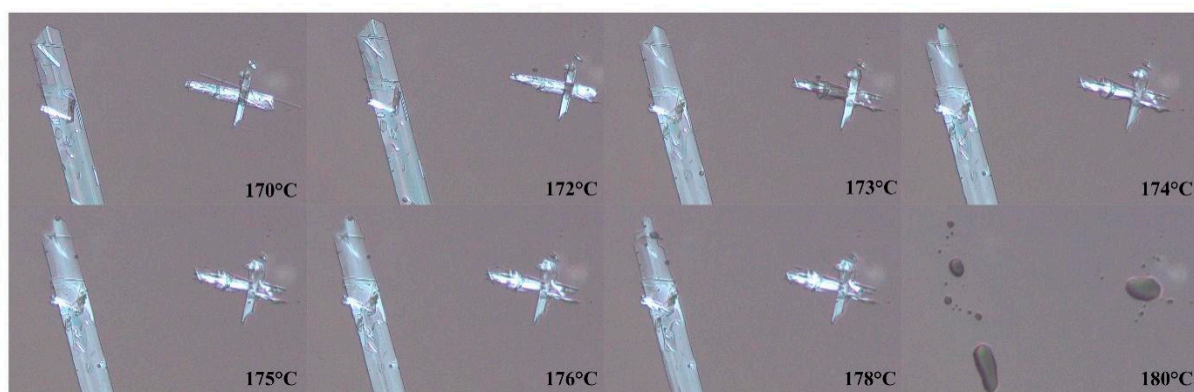

**Figure S8.** HSM images of Form III at different temperatures.

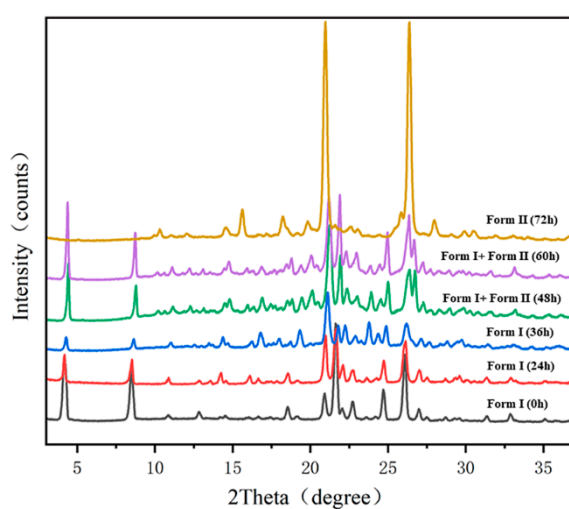

**Figure S9.** The PXRD patterns of Form I in solvent-mediated phase transformation experiments.

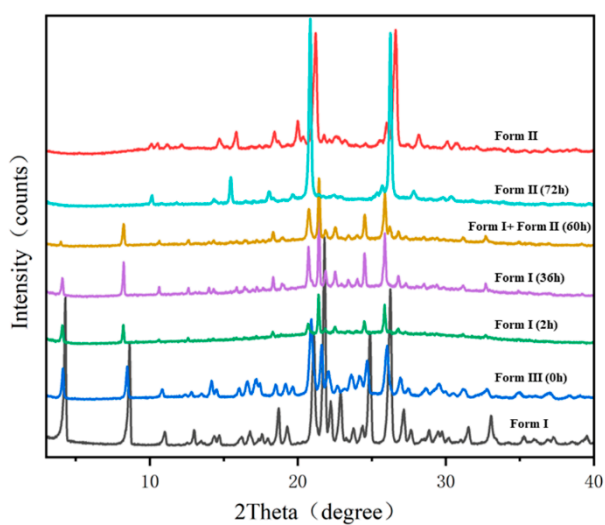

**Figure S10.** The PXRD patterns of Form III in solvent-mediated phase transformation experiments.
